# Supplementary material for: Optimization of the adsorption and removal of Sb(iii) by MIL-53(Fe)/GO using response surface methodology
Source: PubMed Central journal article supplement (PMC8980999; doi:10.1039/d1ra08169a), 2022-02-02
Supplement: RA-012-D1RA08169A-s001.pdf [file RA-012-D1RA08169A-s001.pdf]

**Supplementary Information (SI):**

**SI 1 Experimental Box–Behnken design and removal rate of Sb(III)**

| Standard order | Experiment order | Influencing factor coding level |    |    |    |    | Sb(III)adsorption rate (%) |                  |
|----------------|------------------|---------------------------------|----|----|----|----|----------------------------|------------------|
|                |                  | A                               | B  | C  | D  | E  | Actual value               | Predictive value |
| 1              | 41               | -1                              | -1 | 0  | 0  | 0  | 73.73                      | 75.22            |
| 2              | 30               | 1                               | -1 | 0  | 0  | 0  | 74.57                      | 77.61            |
| 3              | 21               | -1                              | 1  | 0  | 0  | 0  | 82.36                      | 81.36            |
| 4              | 43               | 1                               | 1  | 0  | 0  | 0  | 83.98                      | 84.53            |
| 5              | 4                | 0                               | 0  | -1 | -1 | 0  | 76.39                      | 76.43            |
| 6              | 2                | 0                               | 0  | 1  | -1 | 0  | 86.34                      | 86.04            |
| 7              | 16               | 0                               | 0  | -1 | 1  | 0  | 82.64                      | 84.35            |
| 8              | 14               | 0                               | 0  | 1  | 1  | 0  | 85.51                      | 86.88            |
| 9              | 26               | 0                               | -1 | 0  | 0  | -1 | 91.31                      | 89.43            |
| 10             | 36               | 0                               | 1  | 0  | 0  | -1 | 94.71                      | 94.94            |
| 11             | 37               | 0                               | -1 | 0  | 0  | 1  | 69.39                      | 66.74            |
| 12             | 22               | 0                               | 1  | 0  | 0  | 1  | 74.83                      | 74.29            |
| 13             | 28               | -1                              | 0  | -1 | 0  | 0  | 77.94                      | 76.64            |
| 14             | 32               | 1                               | 0  | -1 | 0  | 0  | 81.80                      | 80.37            |
| 15             | 17               | -1                              | 0  | 1  | 0  | 0  | 85.54                      | 83.66            |
| 16             | 44               | 1                               | 0  | 1  | 0  | 0  | 87.49                      | 85.48            |
| 17             | 3                | 0                               | 0  | 0  | -1 | -1 | 89.68                      | 89.49            |
| 18             | 10               | 0                               | 0  | 0  | 1  | -1 | 97.03                      | 96.05            |
| 19             | 1                | 0                               | 0  | 0  | -1 | 1  | 70.44                      | 70.00            |
| 20             | 9                | 0                               | 0  | 0  | 1  | 1  | 73.43                      | 72.20            |
| 21             | 23               | 0                               | -1 | -1 | 0  | 0  | 75.17                      | 75.73            |
| 22             | 45               | 0                               | 1  | -1 | 0  | 0  | 82.95                      | 83.88            |
| 23             | 18               | 0                               | -1 | 1  | 0  | 0  | 84.50                      | 83.42            |
| 24             | 25               | 0                               | 1  | 1  | 0  | 0  | 89.03                      | 88.32            |
| 25             | 6                | -1                              | 0  | 0  | -1 | 0  | 76.47                      | 76.45            |
| 26             | 7                | 1                               | 0  | 0  | -1 | 0  | 79.28                      | 79.70            |
| 27             | 15               | -1                              | 0  | 0  | 1  | 0  | 82.24                      | 81.29            |
| 28             | 12               | 1                               | 0  | 0  | 1  | 0  | 84.11                      | 83.61            |
| 29             | 34               | 0                               | 0  | -1 | 0  | -1 | 92.21                      | 92.02            |
| 30             | 33               | 0                               | 0  | 1  | 0  | -1 | 93.69                      | 96.07            |
| 31             | 40               | 0                               | 0  | -1 | 0  | 1  | 68.66                      | 68.33            |
| 32             | 35               | 0                               | 0  | 1  | 0  | 1  | 74.18                      | 76.41            |
| 33             | 31               | -1                              | 0  | 0  | 0  | -1 | 87.81                      | 89.06            |
| 34             | 39               | 1                               | 0  | 0  | 0  | -1 | 93.32                      | 92.70            |
| 35             | 42               | -1                              | 0  | 0  | 0  | 1  | 65.82                      | 68.24            |
| 36             | 46               | 1                               | 0  | 0  | 0  | 1  | 69.63                      | 70.18            |
| 37             | 8                | 0                               | -1 | 0  | -1 | 0  | 75.81                      | 76.05            |
| 38             | 5                | 0                               | 1  | 0  | -1 | 0  | 82.46                      | 82.70            |
| 39             | 13               | 0                               | -1 | 0  | 1  | 0  | 80.26                      | 80.55            |
| 40             | 11               | 0                               | 1  | 0  | 1  | 0  | 86.66                      | 86.96            |
| 41             | 19               | 0                               | 0  | 0  | 0  | 0  | 77.60                      | 79.26            |
| 42             | 20               | 0                               | 0  | 0  | 0  | 0  | 78.96                      | 79.26            |
| 43             | 24               | 0                               | 0  | 0  | 0  | 0  | 78.84                      | 79.26            |

|    |    |   |   |   |   |   |       |       |
|----|----|---|---|---|---|---|-------|-------|
| 44 | 27 | 0 | 0 | 0 | 0 | 0 | 80.32 | 79.26 |
| 45 | 29 | 0 | 0 | 0 | 0 | 0 | 79.26 | 79.26 |
| 46 | 38 | 0 | 0 | 0 | 0 | 0 | 80.56 | 79.26 |

SI 2 ANOVA analysis for variance of the model

| Parameter      | Sum of squares | Degree of freedom | Mean square | F value | P value  |                 |
|----------------|----------------|-------------------|-------------|---------|----------|-----------------|
| model          | 2421.56        | 20                | 121.08      | 42.15   | < 0.0001 | significant     |
| A              | 31.00          | 1                 | 31.00       | 10.79   | 0.0030   |                 |
| B              | 170.56         | 1                 | 170.56      | 59.38   | < 0.0001 |                 |
| C              | 147.14         | 1                 | 147.14      | 52.13   | < 0.0001 |                 |
| D              | 76.61          | 1                 | 76.61       | 26.67   | < 0.0001 |                 |
| E              | 1878.79        | 1                 | 1878.79     | 654.12  | < 0.0001 |                 |
| AB             | 0.15           | 1                 | 0.15        | 0.053   | 0.8199   |                 |
| AC             | 0.91           | 1                 | 0.91        | 0.32    | 0.5781   |                 |
| AD             | 0.22           | 1                 | 0.22        | 0.077   | 0.7838   |                 |
| AE             | 0.72           | 1                 | 0.72        | 0.25    | 0.6204   |                 |
| BC             | 2.64           | 1                 | 2.64        | 0.92    | 0.3468   |                 |
| BD             | 0.016          | 1                 | 0.016       | 0.005   | 0.9418   |                 |
| BE             | 1.04           | 1                 | 1.04        | 0.36    | 0.5527   |                 |
| CD             | 12.53          | 1                 | 12.53       | 4.36    | 0.0471   |                 |
| CE             | 4.08           | 1                 | 4.08        | 1.42    | 0.2445   |                 |
| DE             | 4.75           | 1                 | 4.75        | 1.65    | 0.2101   |                 |
| A <sup>2</sup> | 1.70           | 1                 | 1.70        | 0.59    | 0.4492   |                 |
| B <sup>2</sup> | 6.48           | 1                 | 6.48        | 2.25    | 0.1457   |                 |
| C <sup>2</sup> | 64.64          | 1                 | 64.64       | 22.50   | < 0.0001 |                 |
| D <sup>2</sup> | 18.28          | 1                 | 18.28       | 6.36    | 0.0184   |                 |
| E <sup>2</sup> | 13.20          | 1                 | 13.20       | 4.60    | 0.0420   |                 |
| Residual       | 71.81          | 25                | 2.87        |         |          |                 |
| Lack of Fit    | 65.97          | 20                | 3.30        | 2.83    | 0.1263   | not significant |
| Pure Error     | 5.84           | 5                 | 1.17        |         |          |                 |
| Cor Total      | 2493.37        |                   |             |         |          |                 |
